# Supplementary material for: Machine Learning Models for Identification and Prediction of Toxic Organic Compounds Using Daphnia magna Transcriptomic Profiles
Source: MDPI journal article supplement (doi:10.3390/life12091443), 2022-09-16
Supplement: s1 [file s1]

**Supplementary Table S1.** Sublethal concentrations of 22 toxic organic compounds used in this study.

| Organic compounds                    | Concentrations |
|--------------------------------------|----------------|
| 2-chloroethyl-vinyl-ether            | 17.3 mg/L      |
| Acetone                              | 0.1 mL/L       |
| Acrylonitrile                        | 1.27 mg/L      |
| Atrazine                             | 2.07 mg/L      |
| Beta-benzene-hexachloride            | 146 mg/L       |
| Bifenthrin                           | 0.0001 mg/L    |
| Bis2-ethylhexyl-phthalate            | 0.039 mg/L     |
| Chloroform                           | 7.47 mg/L      |
| Chlorpyrifos                         | 0.00129 mg/L   |
| Diazinon                             | 0.0003 mg/L    |
| Dichlorobenzene                      | 1.51 mg/L      |
| Fluvoxamine                          | 0.01 mg/L      |
| Fluoxetine                           | 0.04 mg/L      |
| Lamda-Cyhalothrin                    | 0.0006 mg/L    |
| Nonylphenol                          | 0.02 mg/L      |
| Parathion                            | 0.00226 mg/L   |
| Permethrin                           | 0.00041 mg/L   |
| Phenol                               | 0.79 mg/L      |
| Tris(2-butoxyethyl) phosphate (TBEP) | 0.147 mg/L     |
| 2,4,6-trinitrotoluene (TNT)          | 1.85 mg/L      |
| Toluene                              | 3.58 mg/L      |
| Trichloroethylene                    | 2.49 mg/L      |

**Supplementary Table S4.** Genes (features) ranked by importance using three algorithms.

| <b>Learning Vector Quantization<br/>(LVQ)</b> | <b>Random Forest (RF)</b> | <b>Support Vector Machines<br/>with a Linear kernel<br/>(SVML)</b> |
|-----------------------------------------------|---------------------------|--------------------------------------------------------------------|
| DM03069                                       | DM08825                   | DM03104                                                            |
| DM02384                                       | DM08344                   | DM07830                                                            |
| DM00200                                       | DM01585                   | DM12988                                                            |
| DM08718                                       | DM09934                   | DM06333                                                            |
| DM09941                                       | DM05612                   | DM10161                                                            |
| DM02148                                       | DM03635                   | DM10057                                                            |
| DM01848                                       | DM11516                   | DM00366                                                            |
| DM08097                                       | DM04358                   | DM00978                                                            |
| DM14984                                       | DM07257                   | DM05296                                                            |
| DM09156                                       | DM07979                   | DM14215                                                            |
| DM06805                                       | DM10434                   | DM11455                                                            |
| DM04984                                       | DM11945                   | DM11502                                                            |
| DM01226                                       | DM11139                   | DM15008                                                            |
| DM12308                                       | DM04627                   | DM03273                                                            |
| DM10048                                       | DM00637                   | DM00549                                                            |
| DM07956                                       | DM15036                   | DM09188                                                            |
| DM11327                                       | DM14324                   | DM09464                                                            |
| DM09472                                       | DM02801                   | DM13286                                                            |
| DM12353                                       | DM01012                   | DM06189                                                            |
| DM03700                                       | DM05025                   | DM09347                                                            |

**Supplementary Table S5.** Toxic organic compounds in confusion matrix using the RF/RF combination.

| Number | Toxic organic compounds       |
|--------|-------------------------------|
| 1      | 2-chloroethyl-vinyl-ether     |
| 2      | Acetone                       |
| 3      | Acrylonitrile                 |
| 4      | Atrazine                      |
| 5      | Beta-benzene-hexachloride     |
| 6      | Bifenthrin                    |
| 7      | Bis2-ethylhexyl-phthalate     |
| 8      | Chloroform                    |
| 9      | Chlorpyrifos                  |
| 10     | Diazinon                      |
| 11     | Dichlorobenzene               |
| 12     | Fluvoxamine                   |
| 13     | Fluoxetine                    |
| 14     | Lamda-Cyhalothrin             |
| 15     | Nonylphenol                   |
| 16     | Parathion                     |
| 17     | Permethrin                    |
| 18     | Phenol                        |
| 19     | Tris(2-butoxyethyl) phosphate |
| 20     | 2,4,6-trinitrotoluene         |
| 21     | Toluene                       |
| 22     | Trichloroethylene             |
